# Supplementary material for: Therapeutic Strategies Following Major, Clinically Relevant Nonmajor, and Nuisance Bleeding in Atrial Fibrillation: Findings From ORBIT‐AF
Source: PubMed Central journal article supplement — J Am Heart Assoc. 2018 Jun 9;7(12):e006391. doi: 10.1161/JAHA.117.006391 (PMC6220555; doi:10.1161/jaha.117.006391), 2018-06-09
Supplement: JAH3-7-e006391-s001.pdf [file JAH3-7-e006391-s001.pdf]

# **SUPPLEMENTAL MATERIAL**

**Table S1. Antithrombotic strategies before and after a bleeding event by estimated stroke risk**

| CHA <sub>2</sub> DS <sub>2</sub> -VASc < 2 |                           |                   |                          |                       |                    |
|--------------------------------------------|---------------------------|-------------------|--------------------------|-----------------------|--------------------|
|                                            |                           | Overall<br>N=97   | Treatment Prior to bleed |                       |                    |
|                                            |                           |                   | TT<br>N=2                | APT +<br>OAC<br>N=26  | OAC Only<br>N=69   |
| <b>Treatment<br/>After Bleed</b>           | Triple therapy            | ---               | ---                      | ---                   | ---                |
|                                            | Antiplatelet +OAC         | 25.8              | 50.0                     | 76.9                  | 5.8                |
|                                            | OAC Only                  | 64.9              | 0.0                      | 11.5                  | 87.0               |
|                                            | Dual Antiplatelet         | 2.1               | 50.0                     | 3.8                   | 0.0                |
|                                            | Antiplatelet Only         | 3.1               | 0.0                      | 3.8                   | 2.9                |
|                                            | No Antithrombotic Therapy | 4.1               | 0.0                      | 3.8                   | 4.3                |
|                                            | Missing                   | ---               | ---                      | ---                   | ---                |
| CHA <sub>2</sub> DS <sub>2</sub> -VASc ≥ 2 |                           |                   |                          |                       |                    |
|                                            |                           | Overall<br>N=2559 | Treatment Prior to Bleed |                       |                    |
|                                            |                           |                   | TT<br>N=76               | APT +<br>OAC<br>N=959 | OAC Only<br>N=1524 |
| <b>Treatment<br/>After Bleed</b>           | Triple therapy            | 2.0               | 42.1                     | 1.1                   | 0.5                |
|                                            | Antiplatelet +OAC         | 32.6              | 30.3                     | 75.9                  | 5.5                |
|                                            | OAC Only                  | 54.0              | 7.9                      | 10.9                  | 83.3               |
|                                            | Dual Antiplatelet         | 1.0               | 11.8                     | 0.5                   | 0.7                |
|                                            | Antiplatelet Only         | 4.7               | 3.9                      | 7.2                   | 3.1                |
|                                            | No Antithrombotic Therapy | 5.7               | 3.9                      | 4.2                   | 6.8                |
|                                            | Missing                   | 0.1               | 0.0                      | 0.1                   | 0.1                |

APT = antiplatelet therapy; OAC = oral anticoagulation; TT = triple therapy.

**Table S2. Antithrombotic strategies before and after a bleeding event by history of GI bleed.**

| <b>No History of GI Bleed</b>    |                           |                           |                                 |                                |                            |
|----------------------------------|---------------------------|---------------------------|---------------------------------|--------------------------------|----------------------------|
|                                  |                           | <b>Overall<br/>N=2397</b> | <b>Treatment Prior to bleed</b> |                                |                            |
|                                  |                           |                           | <b>TT<br/>N=71</b>              | <b>APT +<br/>OAC<br/>N=904</b> | <b>OAC Only<br/>N=1422</b> |
| <b>Treatment<br/>After Bleed</b> | Triple therapy            | 1.8                       | 38.0                            | 1.1                            | 0.5                        |
|                                  | Antiplatelet +OAC         | 33.0                      | 31.0                            | 76.1                           | 5.6                        |
|                                  | OAC Only                  | 54.3                      | 8.5                             | 11.2                           | 84.0                       |
|                                  | Dual Antiplatelet         | 1.0                       | 14.1                            | 0.6                            | 0.6                        |
|                                  | Antiplatelet Only         | 4.5                       | 4.2                             | 7.1                            | 3.0                        |
|                                  | No Antithrombotic Therapy | 5.3                       | 4.2                             | 3.9                            | 6.2                        |
|                                  | Missing                   | 0.1                       | 0.0                             | 0.1                            | 0.1                        |
| <b>History of GI Bleed</b>       |                           |                           |                                 |                                |                            |
|                                  |                           | <b>Overall<br/>N=259</b>  | <b>Treatment Prior to Bleed</b> |                                |                            |
|                                  |                           |                           | <b>TT<br/>N=7</b>               | <b>APT +<br/>OAC<br/>N=81</b>  | <b>OAC Only<br/>N=171</b>  |
| <b>Treatment<br/>After Bleed</b> | Triple therapy            | 2.3                       | 71.4                            | 1.2                            | 0.0                        |
|                                  | Antiplatelet +OAC         | 27.1                      | 28.6                            | 74.1                           | 4.7                        |
|                                  | OAC Only                  | 54.8                      | 0.0                             | 8.6                            | 78.9                       |
|                                  | Dual Antiplatelet         | 1.2                       | 0.0                             | 1.2                            | 1.2                        |
|                                  | Antiplatelet Only         | 5.4                       | 0.0                             | 7.4                            | 4.7                        |
|                                  | No Antithrombotic Therapy | 9.3                       | 0.0                             | 7.4                            | 10.5                       |
|                                  | Missing                   | ---                       | ---                             | ---                            | ---                        |

APT = antiplatelet therapy; GI = gastrointestinal; OAC = oral anticoagulation; TT = triple therapy.

**Table S3. Major bleeding event characteristics by age, race, and sex.**

|                             | Overall | Age<75<br>(n=187) | Age≥75<br>(n=296) | p-<br>value‡ | Male<br>(n=249) | Female<br>(n=234) | p-<br>value‡ | Non-<br>White<br>(n=39) | White<br>(n=443) |
|-----------------------------|---------|-------------------|-------------------|--------------|-----------------|-------------------|--------------|-------------------------|------------------|
| Fall in hemoglobin*         | 68.9    | 71.1              | 67.6              | 0.4112       | 68.7            | 69.2              | 0.8951       | 51.3                    | 70.4             |
| Transfusion†                | 49.9    | 51.3              | 49.0              | 0.6152       | 47.0            | 53.0              | 0.1877       | 46.2                    | 50.1             |
| Bleeding in a critical site | 22.2    | 21.9              | 22.3              | 0.9236       | 22.9            | 21.4              | 0.6872       | 25.6                    | 21.9             |
| Bleeding site               |         |                   |                   | 0.0019       |                 |                   | 0.4356       |                         |                  |
| ENT                         | 2.3     | 2.7               | 2.0               |              | 2.8             | 1.7               |              | 0.0                     | 2.5              |
| GU                          | 4.3     | 4.3               | 4.4               |              | 4.4             | 4.3               |              | 7.7                     | 4.1              |
| Vascular Access Site        | 2.3     | 4.3               | 1.0               |              | 2.0             | 2.6               |              | 5.1                     | 2.0              |
| GI                          | 43.1    | 39.0              | 45.6              |              | 47.8            | 38.0              |              | 43.6                    | 42.9             |
| CNS                         | 8.5     | 4.3               | 11.1              |              | 7.6             | 9.4               |              | 7.7                     | 8.6              |
| Perioperative               | 10.8    | 16.0              | 7.4               |              | 10.0            | 11.5              |              | 2.6                     | 11.5             |
| Other                       | 27.1    | 27.3              | 27.0              |              | 24.1            | 30.3              |              | 30.8                    | 26.9             |
| Missing                     | 1.7     | 2.1               | 1.4               |              | 1.2             | 2.1               |              | 2.6                     | 1.6              |

CNS = central nervous system; ENT = ear, nose and throat; GI = gastrointestinal; GU = genitourinary.

\*Fall in hemoglobin of 20 g L<sup>-1</sup> (1.24 mmol L<sup>-1</sup>) or more

†2 or more units of packed red blood cells or whole blood

‡p-values from chi-squared tests
